# Supplementary material for: Statin Therapy and the Development of Cerebral Amyloid Angiopathy—A Rodent in Vivo Approach
Source: PubMed Central journal article supplement (PMC4730367; doi:10.3390/ijms17010126), 2016-01-19
Supplement: ijms-17-00126-s001.pdf [file ijms-17-00126-s001.pdf]

# Statin Therapy and the Development of Cerebral Amyloid Angiopathy—A Rodent *in Vivo* Approach

Björn Reuter, Alexander Venus, Saskia Grudzenski, Patrick Heiler, Lothar Schad, Matthias Staufenbiel, Michael G. Hennerici and Marc Fatar

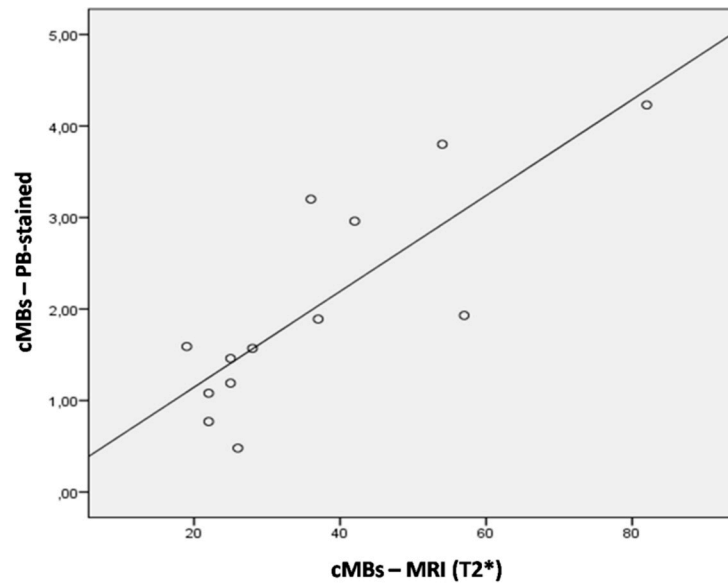

**Figure S1.** Correlation between histological analysis and MRI analysis of cerebral microbleeds (cMBs) in APP23 mice ( $n = 13$ ). Histology: Prussian Blue—stained mice (average number of cMBs per analyzed sections). MRI: total number of analyzed cMBs in T2\*-weighed MR-images.
